# Supplementary material for: How Networks of Queues Came About
Source: Atypon-hosted journal article supplement (doi:10.1287/opre.50.1.112.17801), 2002-02-01
Supplement: opre.50.1.112-sm.pdf [file opre.50.1.112-sm.pdf]

# Online Companion for

## “How *Networks of Queues* Came About”

Operations Research  
Volume 50, Number 1, January-February 2002

James R. Jackson

## **James R. Jackson**

### **Bibliography of Journal Articles in Mathematics and Operations Research**

- On Homotopy Groups of Function Spaces, American Journal Of Mathematics 74,1  
(1952)
- Some Theorems Concerning Absolute Neighborhood Retracts, Pacific Journal of  
Mathematics 2,2 (1952)
- Comparison of Topologies on Function Spaces, Proceedings of the American  
Mathematical Society 3,1 (1952)
- Spaces of Mappings on Topological Products With Applications In Homotopy Theory,  
Proceedings of the American Mathematical Society 3,2 (1952)
- A Partial Ordering Determined By Certain Matrices, Proceedings of The American  
Mathematical Society 4,3 (1954)
- On The Existence Problem of Linear Programming, Pacific Journal of Mathematics 4,1  
(1954)
- A Computing Procedure for the Line Balancing Problem, Management Science 2,3  
(1956)
- An Extension of Johnson's Results on Job Lot Scheduling, Naval Research Logistics  
Quarterly 3,3 (1956)
- Research Problems in Production Scheduling, Industrial Engineering, 7,3 (1956) ... co-  
author, with Alan Rowe
- Networks of Waiting Lines, Operations Research 5,4 (1957)
- SWAC Computations for Some Scheduling Problems, Journal of the Assn. for  
Computing Machinery 4,4 (1957) ... co-author, with R.T Nelson
- Simulation Research on Job Shop Production, Naval Research Logistics Quarterly 4,4  
(1957)
- Multiple Servers With Limited Waiting Space, Naval Research Logistics Quarterly 5,4  
(1958)

La Formation a la Gestion des Entreprises par les Exercices de Gestion Simulee, Travail et Methodes 137 (1959)

Learning From Experience in Business Games, California Management Review 1,2 (1959)

Some Problems in Queueing with Dynamic Priorities, Naval Research Logistics Quarterly 7,3 (1960)

Some Expected Transition Times in Simple Queues, Operations Research 9,2 (1961)

Distribution d'Echantillonnage du Temps Moyen d'Attente Dans un File, Bulletin de la Societe de Sciences de Liege 30,5-6 (1961)

Queues With Dynamic Discipline, Management Science 8,1 (1961)

Waiting Time Distribution for Queues With Dynamic Priorities, Naval Research Logistics Quarterly 9,1 (1962)

Jobshop Like Queueing Systems, Mgmt, Science 10,1 (1963)

Some Rectangular Games With a Two-Man Team, Naval Research Logistics Quarterly 14,1 (1967)

On Decision Theory Under Competition, Management Science 15,1 (1968)

An Improved Model for Occupancy Related Random Variables in General-Acute Hospitals, Operations Research 21,4 (1973) ... co-author with William Shonick.
